# Supplementary material for: Using castor oil to separate microplastics from four different environmental matrices
Source: Royal Society of Chemistry journal article supplement (doi:10.1039/c8ay02559b), 2019-01-01
Supplement: c8ay02559b1.pdf [file c8ay02559b1.pdf]

1 Electronic supplementary information (ESI)

2

3 Using castor oil to separate microplastics from four  
4 different environmental matrices

5

6 *Thomas Mani,<sup>1</sup> Stefan Frehland,<sup>1</sup> Andreas Kalberer,<sup>1</sup> and Patricia Burkhardt-Holm<sup>\*1</sup>*

7

8 <sup>1</sup>The Man-Society-Environment Program, Department of Environmental Sciences, University  
9 of Basel, Vesalgasse 1, 4051 Basel, Switzerland

10 \*Corresponding author:

11 Patricia Burkhardt-Holm, [patricia.holm@unibas.ch](mailto:patricia.holm@unibas.ch)

12

13 **Content Summary:** fourteen pages, seven tables, thirteen figures

14

## 15 MATERIALS AND INSTRUMENTS

16 **Table S1** Details of materials and instruments used in the protocol, as mentioned in section 2.

17 *Materials and Methods* in their respective order of occurrence.

| Material / Instrument                                  | Details                                                                                                                                                                                                         |
|--------------------------------------------------------|-----------------------------------------------------------------------------------------------------------------------------------------------------------------------------------------------------------------|
| Neuston net mesh                                       | 0.3 mm mesh cods, attached to a metal and bamboo construction.                                                                                                                                                  |
| Geological sieves                                      | 1.0, 0.5, 0.3 mm; Retsch, Haan, Germany                                                                                                                                                                         |
| Incubator for drying samples at 40 °C                  | BINDER BD 115, Tuttlingen, Germany                                                                                                                                                                              |
| Scales for weighing samples to nearest mg              | Mettler Toledo XS 105 DualRange, Columbo OH, USA                                                                                                                                                                |
| Heated laboratory stirrer                              | Schott laboratory stirrer SLR, Mainz, Germany                                                                                                                                                                   |
| Grinder for polymer fragmentation                      | Merlin 123 household grinder, WS-Teleshop, Neudorf, Austria                                                                                                                                                     |
| Stereomicroscope                                       | Olympus SZ61, Tokyo, Japan                                                                                                                                                                                      |
| Fourier-Transform Infrared Spectrometer (FT-IR)        | Bruker ALPHA, platinum Diamond-ATR QuickSnap Sampling Module, Bruker, Billerica, MA, USA                                                                                                                        |
| Software Opus 7.5                                      | Bruker, Billerica, Massachusetts, USA; B-KIMW ATR-IR Polymers, Plastics and Additives, 898 entries, library is available upon request                                                                           |
| Castor oil                                             | Cold pressed, organic, lot-no.: 1703A0138, Armonia GmbH, Azmoos, Switzerland<br><a href="https://www.armonia-shop.ch/online-shop/basis%C3%B6le-1/">https://www.armonia-shop.ch/online-shop/basis%C3%B6le-1/</a> |
| Separation funnel                                      | Lenz, Sqibb-F., grad., 2000 mL, PTFE-cock NS 18,8; ground joint NS 29/32                                                                                                                                        |
| Filter paper                                           | Hahnemühle DP 1505 110, pore size: 25 µm, diameter: 11 cm, Dassel, Germany                                                                                                                                      |
| Labware detergent                                      | Mucasol universal detergent, Schülke, Norderstedt, Germany                                                                                                                                                      |
| Hydrogen peroxide, H <sub>2</sub> O <sub>2</sub> (30%) | Sigma-Aldrich, St. Louis, MO, USA                                                                                                                                                                               |

# 19 ENVIRONMENTAL MATRICES SEPARATED WITH THE OIL SEPARATION

## 20 PROTOCOL

### 21 **Table S2** Basic Characteristics of the Four Environmental Matrices

| <b>Name</b>                                                                              | <b>Sample description</b>                                                       | <b>sampling location</b>                                                                                                       | <b>date</b> | <b>figure</b> |
|------------------------------------------------------------------------------------------|---------------------------------------------------------------------------------|--------------------------------------------------------------------------------------------------------------------------------|-------------|---------------|
| MBS<br>Marine Beach<br>Sediment                                                          | Clastic sediment, consisting<br>mainly of quartz; low organic<br>content (< 1%) | 36°00'42.8"N, 5°36'31.3"W,<br>Atlantic, Tarifa, Andalusia,<br>Spain                                                            | 09/2017     | S1 (A)        |
| AS<br>Agricultural<br>Soil                                                               | Agricultural soil                                                               | 47°31'57.6"N, 7°36'53.5"E,<br>Münchenstein, canton of<br>Basel Country, Switzerland                                            | 10/2017     | S1 (B)        |
| MSS<br>Marine<br>Suspended<br>Surface Solids                                             | Suspended surface solids;<br>mainly algae and fine sand                         | 36°00'40.9"N, 5°35'41.7"W,<br>Mediterranean, Tarifa,<br>Andalusia, Spain                                                       | 09/2017     | S1 (C)        |
| FSS<br>Fluvial<br>Suspended<br>Surface Solids                                            | Suspended surface solids; 90%<br>organic biogenic content                       | 47°32'26.3"N, 7°36'59.3"E,<br>Saint-Albanteich, Basel,<br>canton of Basel-City,<br>Switzerland                                 | 01/2018     | S1 (D)        |
| <i>FSS (n = 5)</i> for<br>calibration of<br>MOSeS with<br>environmental<br>microplastics | Suspended surface solids; 90%<br>organic biogenic content                       | 1. 47°30'16.8"N<br>8°14'14.0"E, 86.3<br>m <sup>3</sup> , Limmat River,<br>Untersiggenthal,<br>canton of Aargau,<br>Switzerland | 08/2016     | No<br>fotos   |

|  |  |                                                                                                                             |         |  |
|--|--|-----------------------------------------------------------------------------------------------------------------------------|---------|--|
|  |  | 2. 47°33'19.6"N,<br>7°35'54.8"E, 94.4<br>m <sup>3</sup> , Rhine River,<br>Basel, canton of<br>Basel-City,<br>Switzerland    | 09/2016 |  |
|  |  | 3. 47°33'25.9"N,<br>7°36'27.8"E, 85.6<br>m <sup>3</sup> , Rhine River,<br>Basel, canton of<br>Basel-City,<br>Switzerland    | 09/2016 |  |
|  |  | 4. 50°37'47.0"N,<br>7°12'47.1"E, 70.3<br>m <sup>3</sup> , Rhine River, Bad<br>Honnet, North<br>Rhine-Westphalia,<br>Germany | 09/2016 |  |
|  |  | 5. 51°45'22.6"N,<br>6°24'06.7"E, 84.7<br>m <sup>3</sup> , Rhine River,<br>Rees, North Rhine-<br>Westphalia,<br>Germany      | 09/2016 |  |

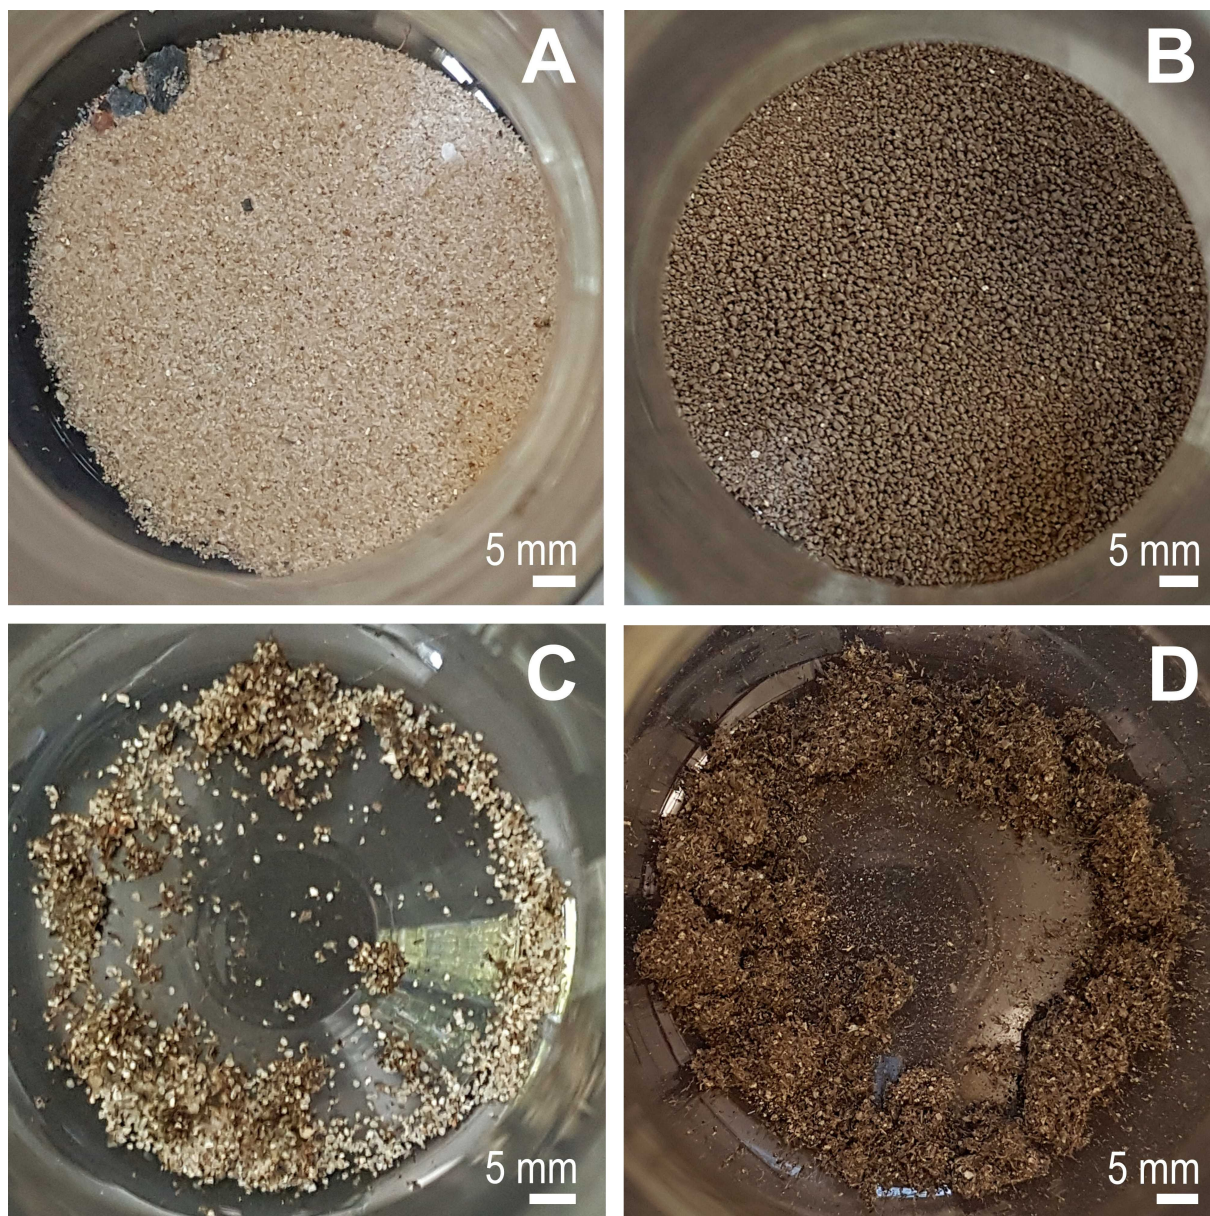

23

24 **Fig S1** Environmental matrix samples before performing the oil separation protocol. (A)

25 Marine beach sediment (MBS), (B) agricultural soil (AS, 10 g each) and (C) marine

26 suspended surface solids (MSS), (D) fluvial suspended surface solids (FSS, 1 g each).

## 27 SCHEMATIC DIAGRAM FOR THE OIL SEPARATION PROTOCOL

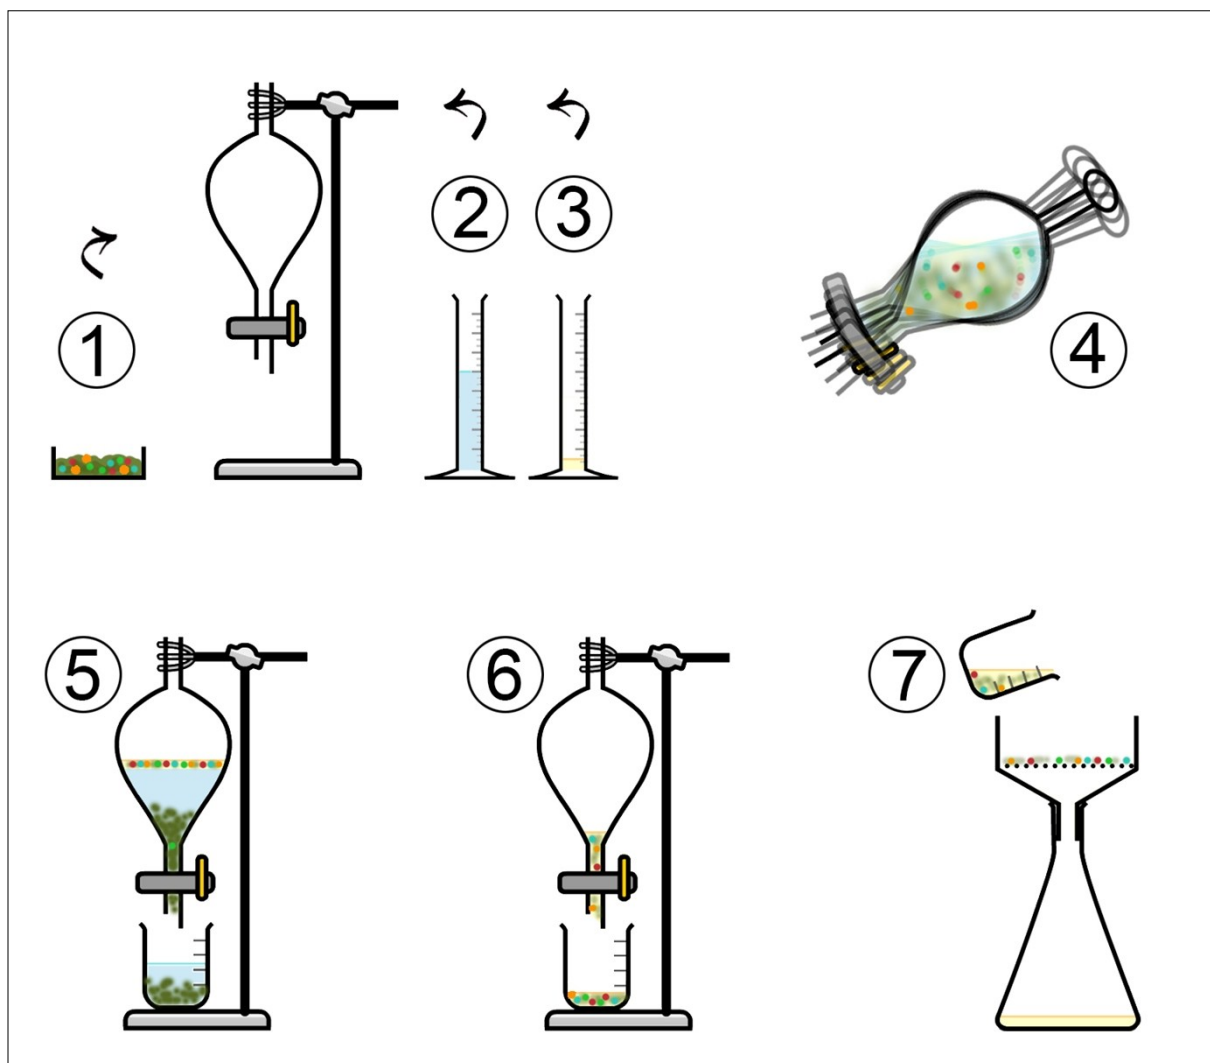

**Fig S2** Castor oil separation protocol depicted in seven steps: add environmental sample (1) and 100 mL of aq. dest. water (2) to the separation funnel and make sure to wet the entire sample. Next, add 10 mL of Castor oil (3) to the separation funnel. Seal and shake the separation funnel for 1 min (4). Let the mixture separate and release lower, aqueous and solid phase (5). Release oil phase to different container (6) and filter oil phase for the recovery of microplastics (7). Diagram was constructed using the CHEMIX School software v2.8.1 (Arne Standnes, Bergen, Norway).

### 37 PLASTIC SPIKE RECOVERY AND ENVIRONMENTAL MATRIX REDUCTION

#### 38 **Table S3** Petrochemical Polymer Spike Recovery Rates and Environmental Matrix Reduction

39 Rates for All Experiment Replicates ( $n = 4$  for each Matrix)

| Environmental matrix | replicate | Recovery rate for reference polymer particles |                        |                          |                           |                            |                        |                          |                           | Environmental matrix dw reduction |
|----------------------|-----------|-----------------------------------------------|------------------------|--------------------------|---------------------------|----------------------------|------------------------|--------------------------|---------------------------|-----------------------------------|
|                      |           | Small particles (0.3–0.5 mm)                  |                        |                          |                           | Large particles (0.5–1 mm) |                        |                          |                           |                                   |
|                      |           | PP<br>( <i>n</i> = 15)                        | PS<br>( <i>n</i> = 15) | PMMA<br>( <i>n</i> = 15) | PET-G<br>( <i>n</i> = 15) | PP<br>( <i>n</i> = 10)     | PS<br>( <i>n</i> = 10) | PMMA<br>( <i>n</i> = 10) | PET-G<br>( <i>n</i> = 10) |                                   |
| MSS                  | 1         | 100%                                          | 100%                   | 100%                     | 100%                      | 100%                       | 100%                   | 100%                     | 100%                      | 94%                               |
|                      | 2         | 100%                                          | 100%                   | 100%                     | 100%                      | 100%                       | 100%                   | 100%                     | 100%                      | 95%                               |
|                      | 3         | 100%                                          | 93%                    | 100%                     | 100%                      | 100%                       | 100%                   | 100%                     | 100%                      | 93%                               |
|                      | 4         | 100%                                          | 100%                   | 100%                     | 93%                       | 100%                       | 100%                   | 100%                     | 100%                      | 93%                               |
| FSS                  | 1         | 100%                                          | 100%                   | 100%                     | 100%                      | 100%                       | 100%                   | 100%                     | 100%                      | 92%                               |
|                      | 2         | 100%                                          | 100%                   | 100%                     | 93%                       | 100%                       | 100%                   | 100%                     | 100%                      | 93%                               |
|                      | 3         | 100%                                          | 93%                    | 93%                      | 87%                       | 100%                       | 100%                   | 100%                     | 100%                      | 92%                               |
|                      | 4         | 100%                                          | 100%                   | 100%                     | 93%                       | 100%                       | 100%                   | 100%                     | 100%                      | 85%                               |
| MBS                  | 1         | 100%                                          | 93%                    | 87%                      | 87%                       | 100%                       | 100%                   | 100%                     | 100%                      | 96%                               |
|                      | 2         | 100%                                          | 100%                   | 100%                     | 100%                      | 100%                       | 100%                   | 100%                     | 100%                      | 98%                               |
|                      | 3         | 100%                                          | 93%                    | 100%                     | 100%                      | 90%                        | 100%                   | 100%                     | 90%                       | 96%                               |
|                      | 4         | 93%                                           | 93%                    | 93%                      | 87%                       | 100%                       | 100%                   | 100%                     | 90%                       | 96%                               |
| AS                   | 1         | 100%                                          | 100%                   | 100%                     | 100%                      | 100%                       | 100%                   | 100%                     | 100%                      | 97%                               |
|                      | 2         | 100%                                          | 100%                   | 100%                     | 100%                      | 100%                       | 100%                   | 100%                     | 100%                      | 99%                               |
|                      | 3         | 100%                                          | 100%                   | 100%                     | 100%                      | 100%                       | 100%                   | 100%                     | 100%                      | 98%                               |
|                      | 4         | 87%                                           | 100%                   | 87%                      | 100%                      | 100%                       | 100%                   | 100%                     | 100%                      | 98%                               |

40



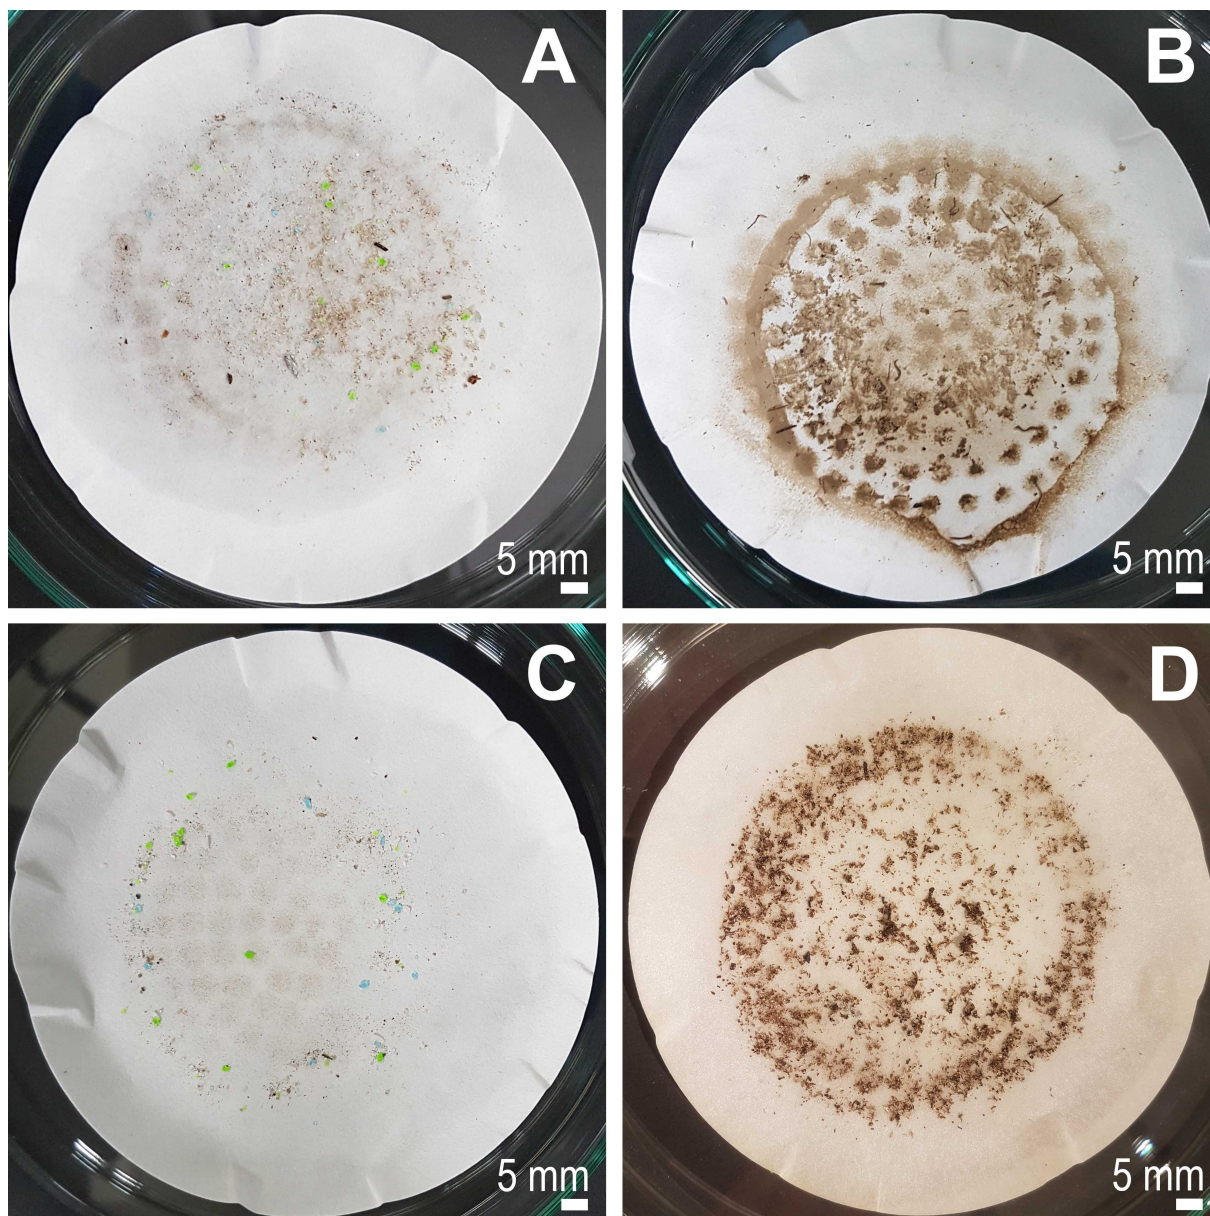

41

42 **Fig S3** Environmental matrix residues and recovered spiked microplastic particles (blue: PS,  
 43 green: PET-G; size range: 0.3–1 mm, visible in panels A and C) on cotton/cellulose filter  
 44 paper (Hahnemuehle DP 1505 110, pore size: 25  $\mu$ m, diameter: 11 cm, Dassel, Germany)  
 45 after performing the MOSeS protocol. (A) Marine beach sediment (MBS), (B) agricultural  
 46 soil (AS), (C) marine suspended surface solids (MSS) and (D) fluvial suspended surface  
 47 solids (FSS).

48



49 MICROPLASTICS IN FIVE NON-SPIKED FSS SAMPLES

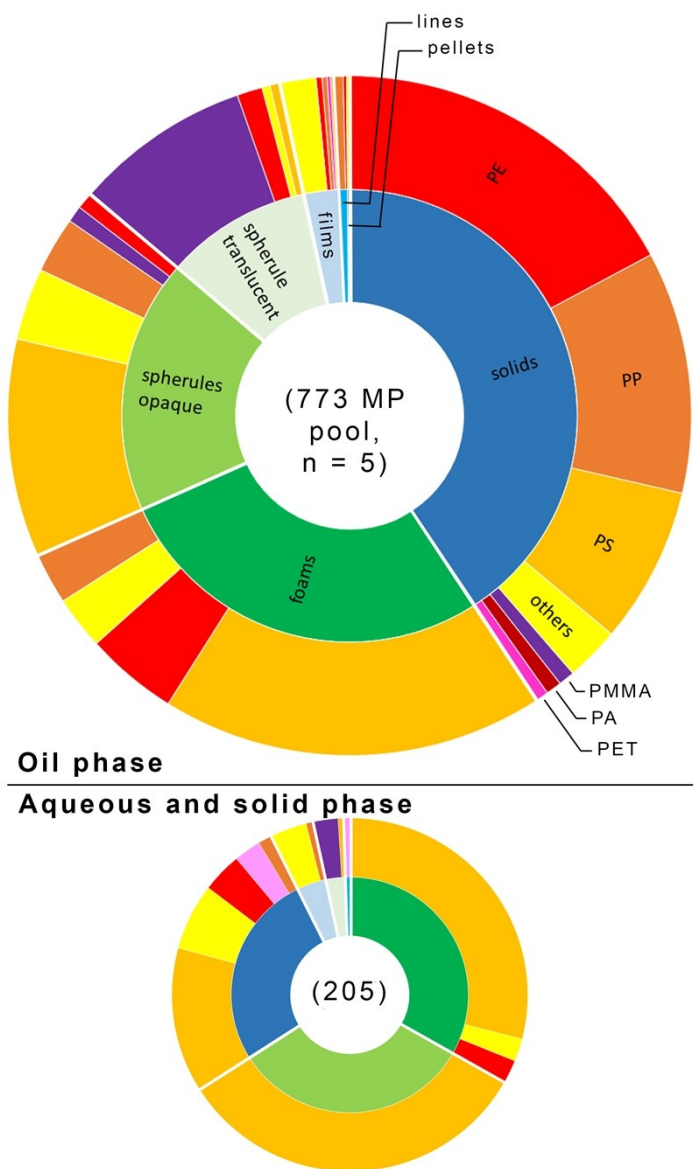

50

51 **Fig S4** Relative proportions of microplastic (MP) categories (inner ring) and polymer types  
52 (outer ring) retrieved from the oil (above) and the aqueous and solid phases (below),  
53 respectively. The two diagrams together represent the pooled amount of MP from five Rhine  
54 River surface samples. After oil separation the five upper oil phases combined contained 773  
55 (79.1%) and the lower aqueous and solid phases contained 205 (20.9%) of the total 978  
56 (100%) MP particles from all five samples. The two inner rings, representing the relative  
57 shares of MP categories, are scaled in percental proportion to each other by surface area  
58 according to number of particles.

59 MICROPLASTIC PARTICLES FOR SPIKING

60 **Table S4** Basic Characteristics of the Polypropylene (PP) used for Spiking

| Polymer/Density                                | Product                                                                                                                                                                                    | Retailer                                      | Fragmentation method (0.3–0.5; 0.5–1.0 mm)                                                                                                       |
|------------------------------------------------|--------------------------------------------------------------------------------------------------------------------------------------------------------------------------------------------|-----------------------------------------------|--------------------------------------------------------------------------------------------------------------------------------------------------|
| Polypropylene (PP),<br>0.84 g cm <sup>-3</sup> | Kitchen strainer RONDO 32.5 cm red<br><a href="https://www.rothoshop.de/Kueche/Sieb-RONDO-32-5-cm.html">https://www.rothoshop.de/Kueche/Sieb-RONDO-32-5-cm.html</a> , accessed on 05.06.18 | Rotho Kunststoff AG, Würenlingen, Switzerland | Coffee grinder (Merlin 123 household grinder, WS-Teleshop, Neudorf, Austria), geological sieves (1 mm, 0.5 mm and 0.3 mm, Retsch, Haan, Germany) |

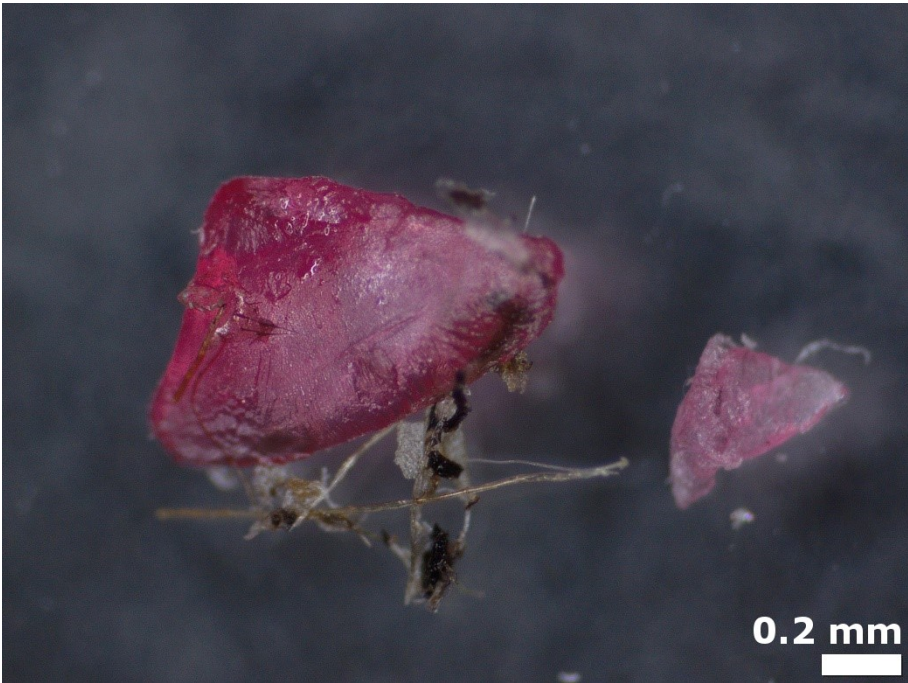

**Fig S5** Large (left) and small (right) PP particles after recovery

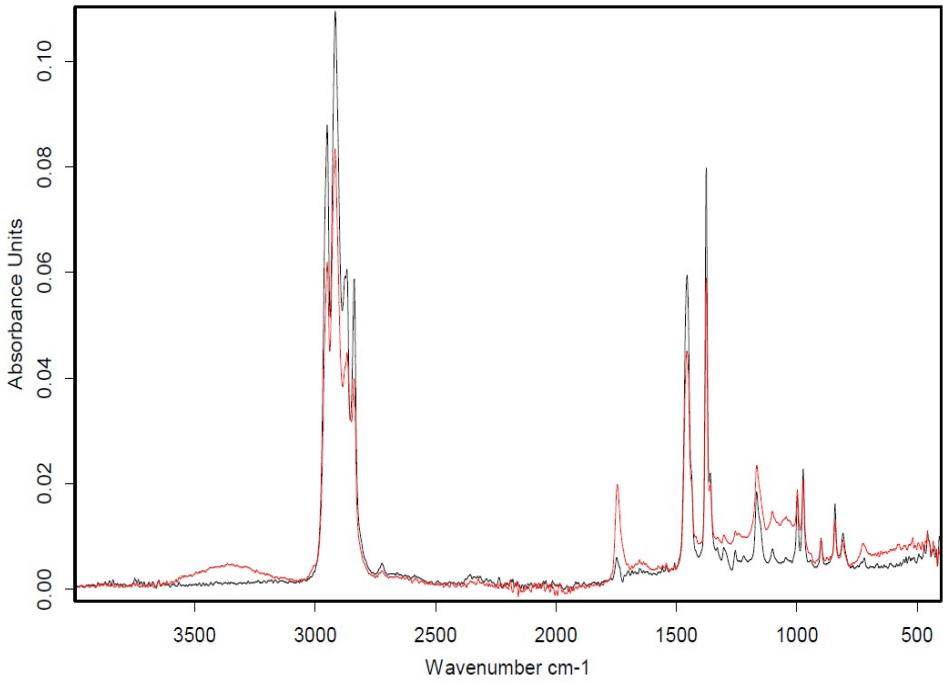

**Fig S6** FT-IR Spectrum of PP before (black) and after (red) separation using the MoSeS protocol (Bruker ALPHA, Billerica, MA, USA)

62 **Table S5** Basic Characteristics of the Polystyrene (PS) used for Spiking

| Polymer/Density                              | Product                                                                                                                                                                                                                                 | Retailer                                   | Fragmentation method (0.3–0.5; 0.5–1.0 mm)                                                                                                       |
|----------------------------------------------|-----------------------------------------------------------------------------------------------------------------------------------------------------------------------------------------------------------------------------------------|--------------------------------------------|--------------------------------------------------------------------------------------------------------------------------------------------------|
| Polystyrene (PS),<br>1.05 g cm <sup>-3</sup> | Colouraplast melting pellets medium-blue, article-ID: 607199 <a href="https://www.aduis.ch/colouraplast-200-g,-mittelblau-art607199.aspx">https://www.aduis.ch/colouraplast-200-g,-mittelblau-art607199.aspx</a> , accessed on 05.06.18 | Creartec trend-design, Lindenberg, Germany | Coffee grinder (Merlin 123 household grinder, WS-Teleshop, Neudorf, Austria), geological sieves (1 mm, 0.5 mm and 0.3 mm, Retsch, Haan, Germany) |

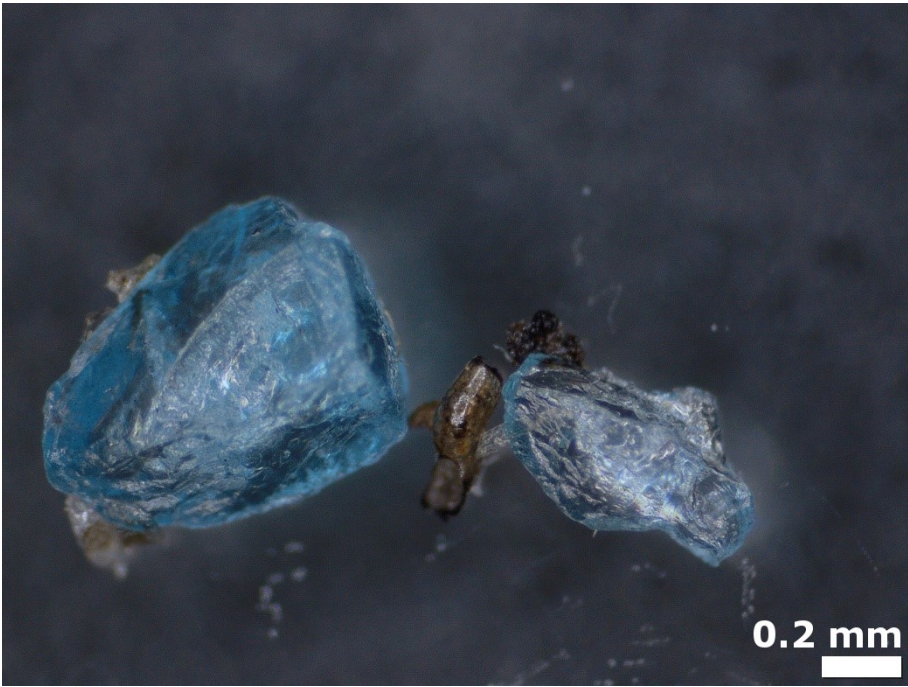

**Fig S7** Large (left) and small (right) PS particles after recovery

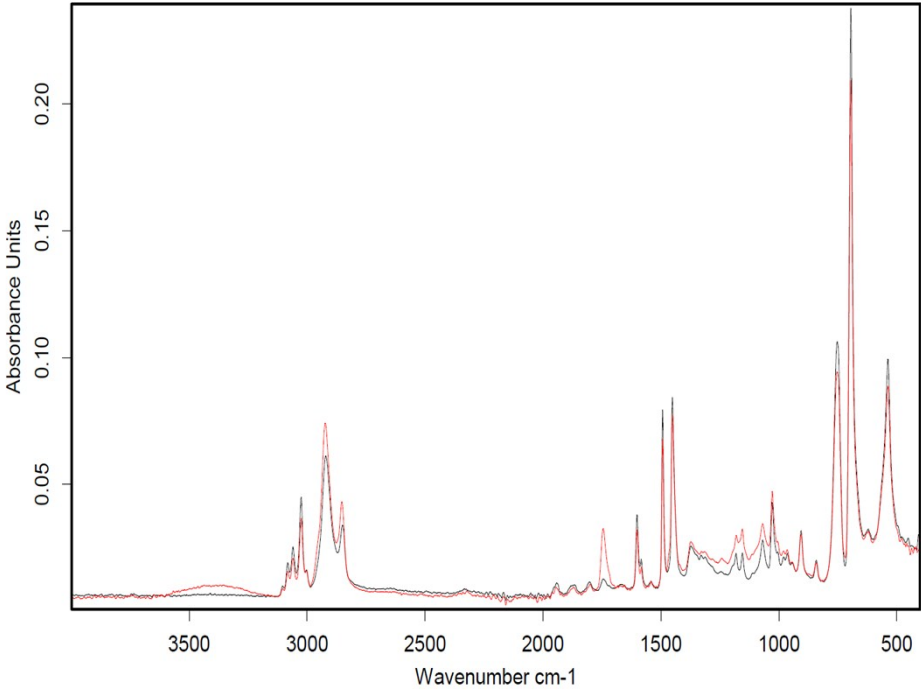

**Fig S8** FT-IR Spectrum of PS before (black) and after (red) separation using the MoSeS protocol (Bruker ALPHA, Billerica, MA, USA)



64 **Table S6** Basic Characteristics of the Polymethyl Methacrylate (PMMA) used for Spiking

| Polymer/Density                                         | Product                                                                                                                                                                                                                                                                                     | Retailer                                | Fragmentation method (0.3–0.5; 0.5–1.0 mm)                                                                                                       |
|---------------------------------------------------------|---------------------------------------------------------------------------------------------------------------------------------------------------------------------------------------------------------------------------------------------------------------------------------------------|-----------------------------------------|--------------------------------------------------------------------------------------------------------------------------------------------------|
| Polymethyl methacrylate (PMMA), 1.19 g cm <sup>-3</sup> | Acrylic glass sheet (3 mm) Evonik, article-ID: 3000813 <a href="https://www.modulor.de/plexiglas-gs-farbig-3-mm-3-0-x-120-x-250-mm-orange-transparent-2c04.html">https://www.modulor.de/plexiglas-gs-farbig-3-mm-3-0-x-120-x-250-mm-orange-transparent-2c04.html</a> , accessed on 05.06.18 | Modulor Material Total, Berlin, Germany | coffee grinder (Merlin 123 household grinder, WS-Teleshop, Neudorf, Austria), geological sieves (1 mm, 0.5 mm and 0.3 mm, Retsch, Haan, Germany) |

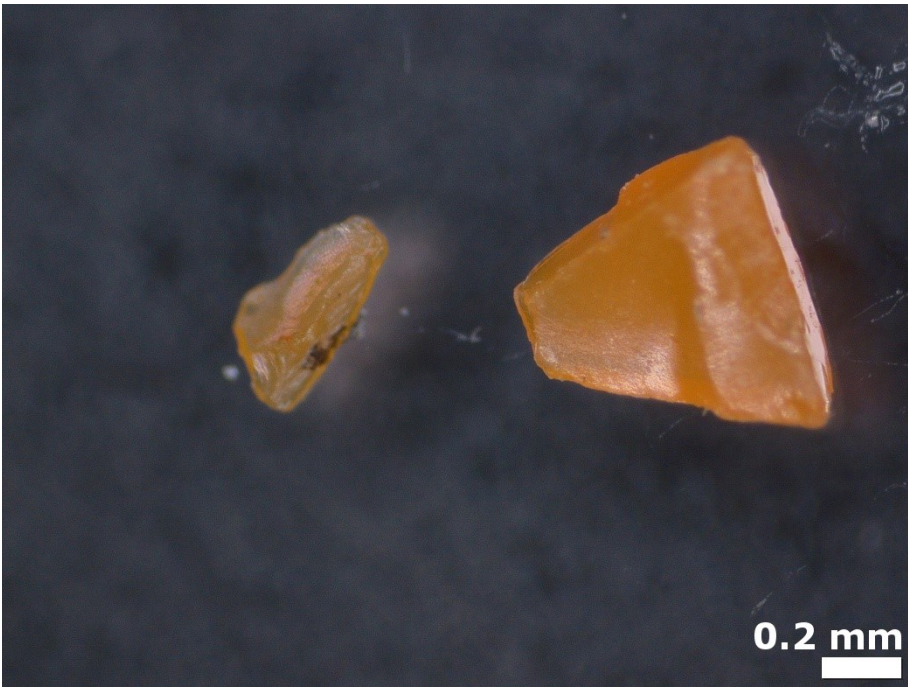

**Fig S9** Large (right) and small (left) PMMA particles after recovery

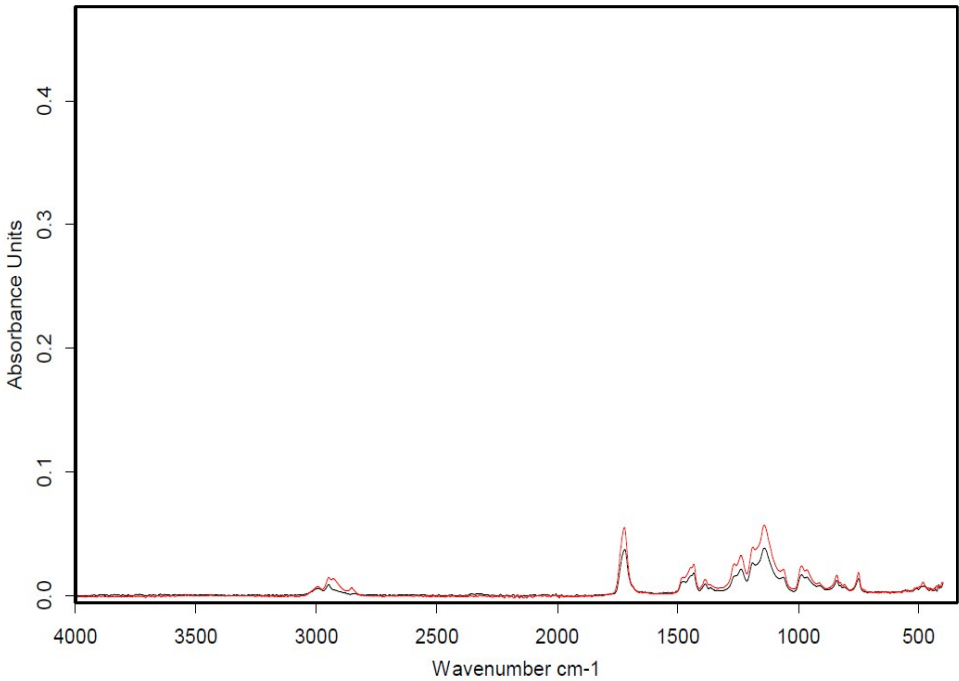

**Fig S10** FT-IR Spectrum of PMMA before (black) and after (red) separation using the MoSeS protocol (Bruker ALPHA, Billerica, MA, USA)

66 **Table S7** Basic Characteristics of the Polyethylene Glycol-Modified (PET-G) used for Spiking

| Polymer/Density                                                             | Product                                                                                                                                                                                                                                                                                                   | Retailer                                             | Fragmentation method (0.3–0.5; 0.5–1.0 mm)                                                                                                       |
|-----------------------------------------------------------------------------|-----------------------------------------------------------------------------------------------------------------------------------------------------------------------------------------------------------------------------------------------------------------------------------------------------------|------------------------------------------------------|--------------------------------------------------------------------------------------------------------------------------------------------------|
| Polyethylene terephthalate glycol-modified (PET-G), 1.27 g cm <sup>-3</sup> | 3D printer filament Minadax, article-ID: 16863<br><a href="https://www.amazon.de/Qualitaet-PET-Filament-transparent-3D-Drucker-hergestellt-gr%C3%bcn/dp/B01781ERXE">https://www.amazon.de/Qualitaet-PET-Filament-transparent-3D-Drucker-hergestellt-gr%C3%bcn/dp/B01781ERXE</a> ,<br>Accessed on 05.06.18 | Minadax online retail services,<br>Dortmund, Germany | Coffee grinder (Merlin 123 household grinder, WS-Teleshop, Neudorf, Austria), geological sieves (1 mm, 0.5 mm and 0.3 mm, Retsch, Haan, Germany) |

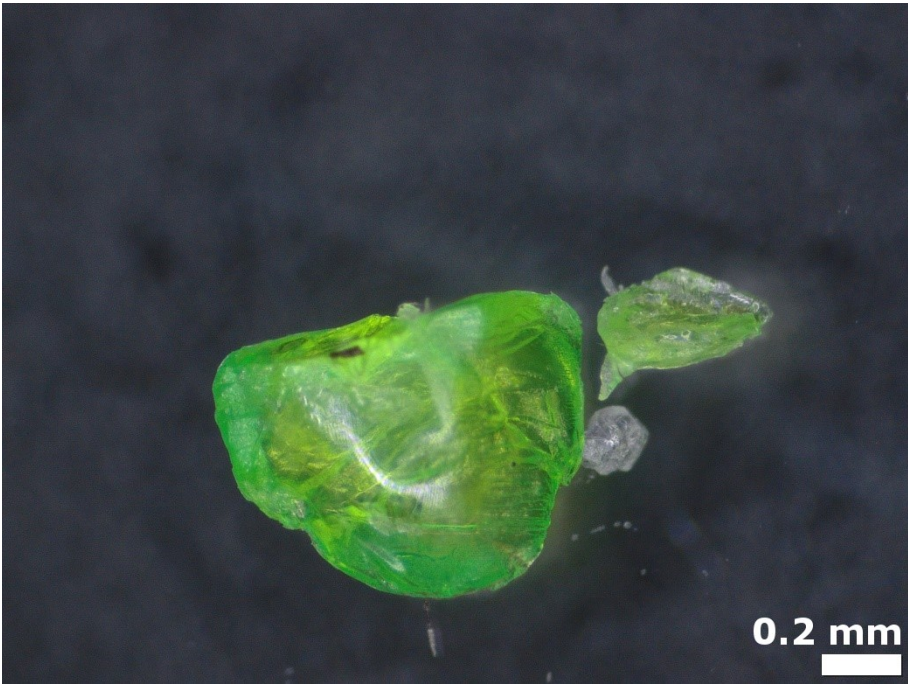

**Fig S11** Large (left) and small (right) PET-G particles after recovery

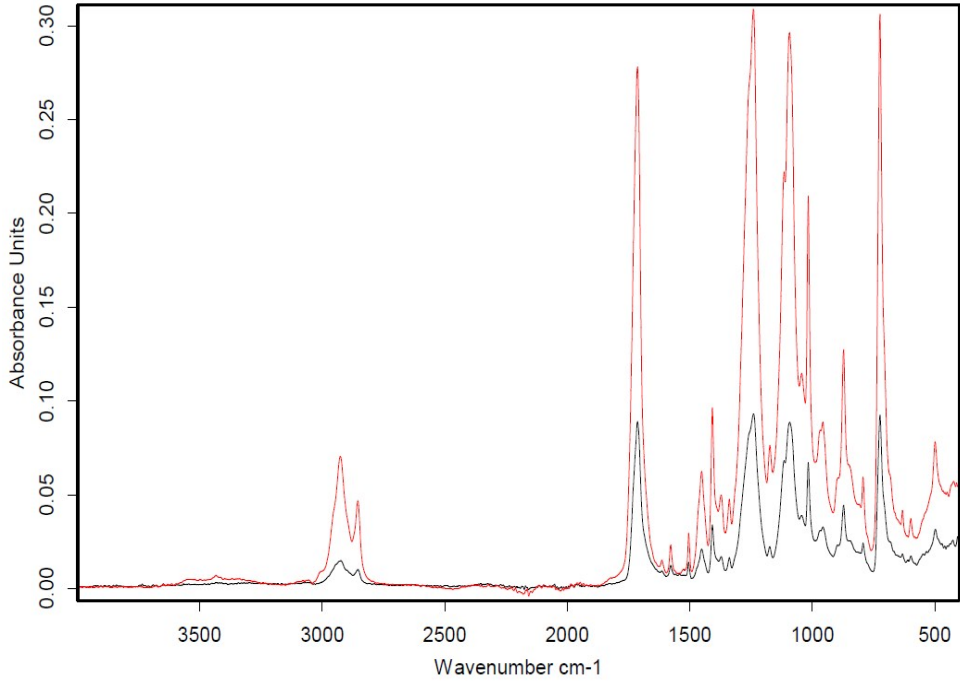

**Fig S12** FT-IR Spectrum of PET-G before (black) and after (red) separation using the MoSeS protocol



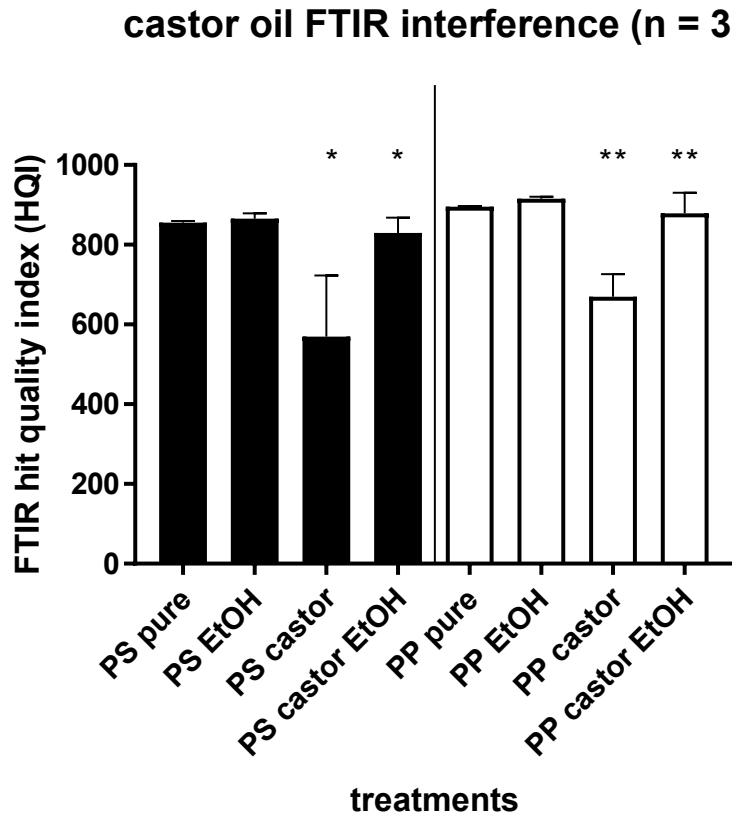

69

70 **Fig S13** Comparison of ATR-FTIR hit quality indices for four treatments of PS and PP virgin  
71 microplastics (0.5–1.2 mm, longest axis) using unpaired t tests. Columns marked with  
72 asterisks indicate significant differences between the treatments of interest (castor oil removal  
73 using EtOH; \* =  $p < 0.05$ , \*\* =  $p < 0.01$ ). HQI > 700 is regarded as a reliable level for confirming  
74 synthetic polymers<sup>1 2</sup>.

## 75 References

- 76 1 R. C. Thompson, Y. Olsen, R. P. Mitchell, A. Davis, S. J. Rowland, A. W. G. John, D.  
77 McGonigle and A. E. Russell, *Science (New York, N.Y.)*, 2004, **304**, 838.
- 78 2 R. W. Obbard, S. Sadri, Y. Q. Wong, A. A. Khitun, I. Baker and R. C. Thompson, *Earth's*  
79 *Future*, 2014, **2**, 315–320.

80
